# Supplementary material
Source: Research Square preprint supplement (doi:10.21203/rs.3.rs-9648908/v1)
Supplement: Supplementary file 1 [file 8d3c3664a5a83dbd127cb682.docx]

# APPENDIX A: Cost of Constructed Apparatus

The costs listed are rounded to the nearest PhP 50. The system used in the entire experiment utilized two pressure gauges, with the costing shown below.

| **Item/Component** | **Cost (Php)** |
| --- | --- |
| 304 Stainless Steel Pipe Body (Male-Threaded) | 750.00 |
| 304 Stainless Steel Pipe Cap (Female-Threaded), 2 Pieces | 700.00 |
| Digital Pressure Gauges (0.4% FS Accuracy) | 5,800.00 |
| Sanitary Fitting | 150.00 |
| Hex Nut | 50.00 |
| Two-Part Epoxy | 150.00 |
| PTFE Gas-Rated Tape | 150.00 |
| Barbed Ball Valve | 50.00 |
| One-Way Check Valve | 150.00 |
| Plastic Container for Electronic Housing | 200.00 |
| PID-SSR-Thermocouple Components | 500.00 |
| Heating Belt | 200.00 |
| Manual Vacuum Pump (Brake Fluid Bleeder Kit) | 350.00 |
| Nylon Mesh, 500-Mesh | 250.00 |
| Drilling, Threading and Cutting Service Fees | 3,000.00 |
|  |  |
| **Total Cost** | **12,450.00** |

However, if the range of pressures were limited, especially in the low-pressure range of -1 to 1 bar relative pressure, the total apparatus cost reduces to approximately **Php 9,500**. These costs do not include other expenses involved in the study that are outside the apparatus directly, such as courier costs, characterization (SEM-EDS) costs and reagent (carbon dioxide, 99.999% purity) costs.

# APPENDIX B: Raw Pressure-Temperature Data

Appendices B to F show the raw data used in the experiment for validation of the results and for further study, such as implementing other adsorption isotherm models that were delimited in the current study.

**(0,5) Pressure Gauge P-T Relationship**

| **Trial** | **Temperature (oC)** | **Pressure Reading (bar)** | **Vacuum (bar)** |
| --- | --- | --- | --- |
| 1 | 30 | 0.09 | -0.95 |
| 35 | 0.10 |
| 40 | 0.13 |
| 45 | 0.14 |
| 50 | 0.15 |
| 55 | 0.18 |
| 60 | 0.20 |
| 2 | 30 | 0.08 | -0.94 |
| 35 | 0.10 |
| 40 | 0.12 |
| 45 | 0.13 |
| 50 | 0.16 |
| 55 | 0.17 |
| 60 | 0.18 |
| 3 | 30 | 0.07 | -0.94 |
| 35 | 0.08 |
| 40 | 0.10 |
| 45 | 0.11 |
| 50 | 0.13 |
| 55 | 0.16 |
| 60 | 0.17 |

**(-1,1) Pressure Gauge P-T Relationship**

| **Trial** | **Temperature (oC)** | **Pressure Reading (bar)** | **Vacuum (bar)** |
| --- | --- | --- | --- |
| 1 | 30 | -0.732 | -0.943 |
| 35 | -0.728 |
| 40 | -0.724 |
| 45 | -0.721 |
| 50 | -0.717 |
| 55 | -0.716 |
| 60 | -0.712 |
| 2 | 30 | -0.743 | -0.951 |
| 35 | -0.739 |
| 40 | -0.735 |
| 45 | -0.732 |
| 50 | -0.727 |
| 55 | -0.725 |
| 60 | -0.723 |
| 3 | 30 | -0.750 | -0.952 |
| 35 | -0.745 |
| 40 | -0.742 |
| 45 | -0.741 |
| 50 | -0.737 |
| 55 | -0.734 |
| 60 | -0.730 |

# APPENDIX C: Raw Thermal Expansion Effects (Blank) Data

**0.2-Bar Carbon Dioxide Input**

| **Trial** | **Time (min)** | **Pressure Reading (bar)** | **Vacuum (bar)** |
| --- | --- | --- | --- |
| 1 | 0 | -0.745 | -0.952 |
| 3 | -0.733 |
| 6 | -0.733 |
| 9 | -0.733 |
| 12 | -0.733 |
| 15 | -0.733 |
| 2 | 0 | -0.751 | -0.949 |
| 3 | -0.739 |
| 6 | -0.739 |
| 9 | -0.739 |
| 12 | -0.739 |
| 15 | -0.739 |
| 3 | 0 | -0.734 | -0.952 |
| 3 | -0.722 |
| 6 | -0.722 |
| 9 | -0.722 |
| 12 | -0.722 |
| 15 | -0.722 |

**0.4-Bar Carbon Dioxide Input**

| **Trial** | **Time (min)** | **Pressure Reading (bar)** | **Vacuum (bar)** |
| --- | --- | --- | --- |
| 1 | 0 | -0.521 | -0.949 |
| 3 | -0.500 |
| 6 | -0.500 |
| 9 | -0.500 |
| 12 | -0.500 |
| 15 | -0.500 |
| 2 | 0 | -0.543 | -0.951 |
| 3 | -0.524 |
| 6 | -0.524 |
| 9 | -0.524 |
| 12 | -0.524 |
| 15 | -0.524 |
| 3 | 0 | -0.509 | -0.950 |
| 3 | -0.486 |
| 6 | -0.486 |
| 9 | -0.486 |
| 12 | -0.486 |
| 15 | -0.486 |

**0.6-Bar Carbon Dioxide Input**

| **Trial** | **Time (min)** | **Pressure Reading (bar)** | **Vacuum (bar)** |
| --- | --- | --- | --- |
| 1 | 0 | -0.354 | -0.952 |
| 3 | -0.329 |
| 6 | -0.329 |
| 9 | -0.329 |
| 12 | -0.329 |
| 15 | -0.329 |
| 2 | 0 | -0.344 | -0.949 |
| 3 | -0.323 |
| 6 | -0.315 |
| 9 | -0.315 |
| 12 | -0.315 |
| 15 | -0.315 |
| 3 | 0 | -0.347 | -0.951 |
| 3 | -0.327 |
| 6 | -0.319 |
| 9 | -0.319 |
| 12 | -0.319 |
| 15 | -0.319 |

**0.8-Bar Carbon Dioxide Input**

| **Trial** | **Time (min)** | **Pressure Reading (bar)** | **Vacuum (bar)** |
| --- | --- | --- | --- |
| 1 | 0 | -0.152 | -0.953 |
| 3 | -0.114 |
| 6 | -0.106 |
| 9 | -0.152 |
| 12 | -0.114 |
| 15 | -0.106 |
| 2 | 0 | -0.134 | -0.952 |
| 3 | -0.099 |
| 6 | -0.088 |
| 9 | -0.088 |
| 12 | -0.088 |
| 15 | -0.088 |
| 3 | 0 | -0.141 | -0.953 |
| 3 | -0.107 |
| 6 | -0.095 |
| 9 | -0.095 |
| 12 | -0.095 |
| 15 | -0.095 |

**1-Bar Carbon Dioxide Input**

| **Trial** | **Time (min)** | **Pressure Reading (bar)** | **Vacuum (bar)** |
| --- | --- | --- | --- |
| 1 | 0 | 0.03 | -0.95 |
| 3 | 0.06 |
| 6 | 0.08 |
| 9 | 0.11 |
| 12 | 0.11 |
| 15 | 0.11 |
| 2 | 0 | 0.04 | -0.95 |
| 3 | 0.08 |
| 6 | 0.11 |
| 9 | 0.11 |
| 12 | 0.11 |
| 15 | 0.11 |
| 3 | 0 | 0.06 | -0.95 |
| 3 | 0.10 |
| 6 | 0.11 |
| 9 | 0.13 |
| 12 | 0.13 |
| 15 | 0.13 |

**2-Bar Carbon Dioxide Input**

| **Trial** | **Time (min)** | **Pressure Reading (bar)** | **Vacuum (bar)** |
| --- | --- | --- | --- |
| 1 | 0 | 0.97 | -0.94 |
| 3 | 1.01 |
| 6 | 1.03 |
| 9 | 1.03 |
| 12 | 1.05 |
| 15 | 1.05 |
| 2 | 0 | 0.96 | -0.95 |
| 3 | 1.00 |
| 6 | 1.02 |
| 9 | 1.04 |
| 12 | 1.04 |
| 15 | 1.04 |
| 3 | 0 | 1.02 | -0.95 |
| 3 | 1.08 |
| 6 | 1.08 |
| 9 | 1.11 |
| 12 | 1.11 |
| 15 | 1.11 |

**3-Bar Carbon Dioxide Input**

| **Trial** | **Time (min)** | **Pressure Reading (bar)** | **Vacuum (bar)** |
| --- | --- | --- | --- |
| 1 | 0 | 2.09 | -0.95 |
| 3 | 2.15 |
| 6 | 2.15 |
| 9 | 2.15 |
| 12 | 2.18 |
| 15 | 2.18 |
| 2 | 0 | 2.03 | -0.95 |
| 3 | 2.08 |
| 6 | 2.10 |
| 9 | 2.11 |
| 12 | 2.12 |
| 15 | 2.12 |
| 3 | 0 | 1.97 | -0.95 |
| 3 | 2.02 |
| 6 | 2.04 |
| 9 | 2.05 |
| 12 | 2.06 |
| 15 | 2.06 |

**4-Bar Carbon Dioxide Input**

| **Trial** | **Time (min)** | **Pressure Reading (bar)** | **Vacuum (bar)** |
| --- | --- | --- | --- |
| 1 | 0 | 3.05 | -0.95 |
| 3 | 3.10 |
| 6 | 3.13 |
| 9 | 3.14 |
| 12 | 3.16 |
| 15 | 3.16 |
| 2 | 0 | 3.03 | -0.94 |
| 3 | 3.08 |
| 6 | 3.11 |
| 9 | 3.12 |
| 12 | 3.14 |
| 15 | 3.14 |
| 3 | 0 | 3.12 | -0.95 |
| 3 | 3.19 |
| 6 | 3.19 |
| 9 | 3.21 |
| 12 | 3.23 |
| 15 | 3.23 |

**5-Bar Carbon Dioxide Input**

| **Trial** | **Time (min)** | **Pressure Reading (bar)** | **Vacuum (bar)** |
| --- | --- | --- | --- |
| 1 | 0 | 4.01 | -0.94 |
| 3 | 4.09 |
| 6 | 4.11 |
| 9 | 4.11 |
| 12 | 4.13 |
| 15 | 4.13 |
| 2 | 0 | 4.05 | -0.95 |
| 3 | 4.12 |
| 6 | 4.15 |
| 9 | 4.18 |
| 12 | 4.18 |
| 15 | 4.18 |
| 3 | 0 | 4.08 | -0.95 |
| 3 | 4.16 |
| 6 | 4.20 |
| 9 | 4.20 |
| 12 | 4.21 |
| 15 | 4.21 |

# APPENDIX D: Raw Kinetics Data

**CHAC, 303 K**

| **Trial** | **Mass AC (g)** | **Time (min)** | **Pressure Reading (bar)** | **Vacuum (bar)** |
| --- | --- | --- | --- | --- |
| 1 | 0.3012 | 0 | 4.04 | -0.95 |
| 3 | 4.10 |
| 6 | 4.13 |
| 9 | 4.14 |
| 12 | 4.14 |
| 15 | 4.14 |
| 18 | 4.13 |
| 21 | 4.13 |
| 24 | 4.13 |
| 27 | 4.13 |
| 30 | 4.13 |
| 2 | 0.3006 | 0 | 4.10 | -0.95 |
| 3 | 4.17 |
| 6 | 4.18 |
| 9 | 4.19 |
| 12 | 4.19 |
| 15 | 4.19 |
| 18 | 4.19 |
| 21 | 4.19 |
| 24 | 4.19 |
| 27 | 4.19 |
| 30 | 4.19 |
| 3 | 0.3023 | 0 | 4.04 | -0.94 |
| 3 | 4.12 |
| 6 | 4.13 |
| 9 | 4.14 |
| 12 | 4.14 |
| 15 | 4.14 |
| 18 | 4.13 |
| 21 | 4.13 |
| 24 | 4.13 |
| 27 | 4.13 |
| 30 | 4.13 |

**BAC, 303 K**

| **Trial** | **Mass AC (g)** | **Time (min)** | **Pressure Reading (bar)** | **Vacuum (bar)** |
| --- | --- | --- | --- | --- |
| 1 | 0.3001 | 0 | 4.11 | -0.95 |
| 3 | 4.16 |
| 6 | 4.17 |
| 9 | 4.17 |
| 12 | 4.18 |
| 15 | 4.18 |
| 18 | 4.18 |
| 21 | 4.18 |
| 24 | 4.17 |
| 27 | 4.17 |
| 30 | 4.17 |
| 2 | 0.3034 | 0 | 4.09 | -0.95 |
| 3 | 4.15 |
| 6 | 4.17 |
| 9 | 4.17 |
| 12 | 4.18 |
| 15 | 4.18 |
| 18 | 4.18 |
| 21 | 4.17 |
| 24 | 4.17 |
| 27 | 4.16 |
| 30 | 4.16 |
| 3 | 0.3017 | 0 | 4.09 | -0.95 |
| 3 | 4.15 |
| 6 | 4.17 |
| 9 | 4.17 |
| 12 | 4.18 |
| 15 | 4.18 |
| 18 | 4.17 |
| 21 | 4.17 |
| 24 | 4.16 |
| 27 | 4.16 |
| 30 | 4.16 |

**A-CHAC, 303 K**

| **Trial** | **Mass AC (g)** | **Time (min)** | **Pressure Reading (bar)** | **Vacuum (bar)** |
| --- | --- | --- | --- | --- |
| 1 | 0.3021 | 0 | 4.07 | -0.95 |
| 3 | 4.15 |
| 6 | 4.16 |
| 9 | 4.16 |
| 12 | 4.16 |
| 15 | 4.15 |
| 18 | 4.14 |
| 21 | 4.14 |
| 24 | 4.14 |
| 27 | 4.14 |
| 30 | 4.14 |
| 2 | 0.3025 | 0 | 4.08 | -0.94 |
| 3 | 4.15 |
| 6 | 4.15 |
| 9 | 4.15 |
| 12 | 4.16 |
| 15 | 4.15 |
| 18 | 4.15 |
| 21 | 4.15 |
| 24 | 4.15 |
| 27 | 4.15 |
| 30 | 4.15 |
| 3 | 0.3027 | 0 | 4.08 | -0.94 |
| 3 | 4.16 |
| 6 | 4.16 |
| 9 | 4.16 |
| 12 | 4.17 |
| 15 | 4.16 |
| 18 | 4.15 |
| 21 | 4.15 |
| 24 | 4.15 |
| 27 | 4.15 |
| 30 | 4.15 |

**B-CHAC, 303 K**

| **Trial** | **Mass AC (g)** | **Time (min)** | **Pressure Reading (bar)** | **Vacuum (bar)** |
| --- | --- | --- | --- | --- |
| 1 | 0.3041 | 0 | 4.08 | -0.94 |
| 3 | 4.15 |
| 6 | 4.16 |
| 9 | 4.17 |
| 12 | 4.17 |
| 15 | 4.16 |
| 18 | 4.16 |
| 21 | 4.16 |
| 24 | 4.15 |
| 27 | 4.15 |
| 30 | 4.15 |
| 2 | 0.3005 | 0 | 4.07 | -0.96 |
| 3 | 4.14 |
| 6 | 4.15 |
| 9 | 4.16 |
| 12 | 4.16 |
| 15 | 4.15 |
| 18 | 4.15 |
| 21 | 4.15 |
| 24 | 4.14 |
| 27 | 4.14 |
| 30 | 4.14 |
| 3 | 0.3007 | 0 | 4.09 | -0.95 |
| 3 | 4.16 |
| 6 | 4.17 |
| 9 | 4.18 |
| 12 | 4.18 |
| 15 | 4.18 |
| 18 | 4.18 |
| 21 | 4.17 |
| 24 | 4.17 |
| 27 | 4.17 |
| 30 | 4.17 |

**T-CHAC, 323 K**

| **Trial** | **Mass AC (g)** | **Time (min)** | **Pressure Reading (bar)** | **Vacuum (bar)** |
| --- | --- | --- | --- | --- |
| 1 | 0.3002 | 0 | 4.04 | -0.95 |
| 3 | 4.12 |
| 6 | 4.13 |
| 9 | 4.14 |
| 12 | 4.14 |
| 15 | 4.14 |
| 18 | 4.14 |
| 21 | 4.14 |
| 24 | 4.14 |
| 27 | 4.14 |
| 30 | 4.14 |
| 2 | 0.3015 | 0 | 4.05 | -0.95 |
| 3 | 4.13 |
| 6 | 4.14 |
| 9 | 4.15 |
| 12 | 4.16 |
| 15 | 4.15 |
| 18 | 4.15 |
| 21 | 4.15 |
| 24 | 4.15 |
| 27 | 4.15 |
| 30 | 4.15 |
| 3 | 0.3021 | 0 | 4.06 | -0.95 |
| 3 | 4.14 |
| 6 | 4.15 |
| 9 | 4.16 |
| 12 | 4.16 |
| 15 | 4.16 |
| 18 | 4.16 |
| 21 | 4.16 |
| 24 | 4.16 |
| 27 | 4.16 |
| 30 | 4.16 |

# APPENDIX E: Raw Isotherm Data

**CHAC, 303 K**

| **Trial** | **Mass AC (g)** | **Nominal P (bar)** | **Initial P (bar)** | **Final P (bar)** | **Vacuum (bar)** |
| --- | --- | --- | --- | --- | --- |
| 1 | 0.3310 | 0.2 | -0.741 | -0.737 | -0.952 |
| 0.3269 | 0.4 | -0.564 | -0.561 | -0.954 |
| 0.2990 | 0.6 | -0.365 | -0.357 | -0.952 |
| 0.3071 | 0.8 | -0.131 | -0.113 | -0.955 |
| 0.2904 | 1 | 0.09 | 0.13 | -0.95 |
| 0.2974 | 2 | 1.08 | 1.11 | -0.95 |
| 0.2993 | 3 | 2.05 | 2.10 | -0.96 |
| 0.3007 | 4 | 3.08 | 3.15 | -0.95 |
| 0.2993 | 5 | 4.11 | 4.20 | -0.96 |
| 2 | 0.3119 | 0.2 | -0.701 | -0.698 | -0.952 |
| 0.3167 | 0.4 | -0.532 | -0.525 | -0.948 |
| 0.3220 | 0.6 | -0.347 | -0.337 | -0.953 |
| 0.3194 | 0.8 | -0.162 | -0.138 | -0.955 |
| 0.3220 | 1 | 0.07 | 0.11 | -0.95 |
| 0.3219 | 2 | 1.20 | 1.24 | -0.96 |
| 0.3199 | 3 | 2.01 | 2.06 | -0.96 |
| 0.3168 | 4 | 3.15 | 3.22 | -0.96 |
| 0.3217 | 5 | 4.19 | 4.27 | -0.95 |
| 3 | 0.2996 | 0.2 | -0.767 | -0.764 | -0.949 |
| 0.2991 | 0.4 | -0.542 | -0.536 | -0.953 |
| 0.3029 | 0.6 | -0.328 | -0.321 | -0.953 |
| 0.3101 | 0.8 | -0.143 | -0.121 | -0.952 |
| 0.3032 | 1 | 0.19 | 0.23 | -0.95 |
| 0.2983 | 2 | 1.17 | 1.21 | -0.95 |
| 0.2984 | 3 | 2.24 | 2.29 | -0.95 |
| 0.2952 | 4 | 3.04 | 3.12 | -0.95 |
| 0.2992 | 5 | 4.26 | 4.35 | -0.95 |

**BAC, 303 K**

| **Trial** | **Mass AC (g)** | **Nominal P (bar)** | **Initial P (bar)** | **Final P (bar)** | **Vacuum (bar)** |
| --- | --- | --- | --- | --- | --- |
| 1 | 0.3067 | 0.2 | -0.718 | -0.715 | -0.951 |
| 0.3060 | 0.4 | -0.528 | -0.520 | -0.949 |
| 0.2982 | 0.6 | -0.361 | -0.348 | -0.950 |
| 0.3036 | 0.8 | -0.158 | -0.131 | -0.952 |
| 0.2191 | 1 | 0.10 | 0.15 | -0.95 |
| 0.2913 | 2 | 1.03 | 1.06 | -0.95 |
| 0.3094 | 3 | 2.10 | 2.14 | -0.95 |
| 0.2905 | 4 | 3.10 | 3.16 | -0.94 |
| 0.2916 | 5 | 4.11 | 4.18 | -0.95 |
| 2 | 0.3004 | 0.2 | -0.743 | -0.741 | -0.952 |
| 0.3119 | 0.4 | -0.525 | -0.518 | -0.959 |
| 0.3083 | 0.6 | -0.321 | -0.312 | -0.956 |
| 0.2924 | 0.8 | -0.132 | -0.109 | -0.951 |
| 0.3026 | 1 | 0.17 | 0.21 | -0.94 |
| 0.2916 | 2 | 1.14 | 1.17 | -0.95 |
| 0.3009 | 3 | 2.08 | 2.11 | -0.95 |
| 0.2954 | 4 | 3.15 | 3.20 | -0.95 |
| 0.3001 | 5 | 4.08 | 4.15 | -0.95 |
| 3 | 0.3028 | 0.2 | -0.752 | -0.749 | -0.950 |
| 0.2970 | 0.4 | -0.528 | -0.520 | -0.949 |
| 0.2924 | 0.6 | -0.362 | -0.351 | -0.952 |
| 0.2991 | 0.8 | -0.141 | -0.124 | -0.949 |
| 0.2935 | 1 | 0.16 | 0.18 | -0.95 |
| 0.2995 | 2 | 1.01 | 1.04 | -0.95 |
| 0.3002 | 3 | 2.19 | 2.23 | -0.95 |
| 0.3085 | 4 | 3.12 | 3.17 | -0.95 |
| 0.2924 | 5 | 4.26 | 4.35 | -0.95 |

**A-CHAC, 303 K (Single Replicate)**

| **Trial** | **Mass AC (g)** | **Nominal P (bar)** | **Initial P (bar)** | **Final P (bar)** | **Vacuum (bar)** |
| --- | --- | --- | --- | --- | --- |
| 1 | 0.3027 | 0.2 | -0.755 | -0.751 | -0.952 |
| 0.2985 | 0.4 | -0.548 | -0.548 | -0.949 |
| 0.3012 | 0.6 | -0.360 | -0.357 | -0.951 |
| 0.2983 | 0.8 | -0.148 | -0.129 | -0.951 |
| 0.2989 | 1 | 0.08 | 0.12 | -0.96 |
| 0.3058 | 2 | 1.06 | 1.09 | -0.96 |
| 0.2967 | 3 | 2.04 | 2.08 | -0.95 |
| 0.2973 | 4 | 3.10 | 3.16 | -0.95 |
| 0.2986 | 5 | 4.10 | 4.17 | -0.96 |

**B-CHAC, 303 K (Single Replicate)**

| **Trial** | **Mass AC (g)** | **Nominal P (bar)** | **Initial P (bar)** | **Final P (bar)** | **Vacuum (bar)** |
| --- | --- | --- | --- | --- | --- |
| 1 | 0.3054 | 0.2 | -0.745 | -0.742 | -0.955 |
| 0.3021 | 0.4 | -0.548 | -0.551 | -0.951 |
| 0.2932 | 0.6 | -0.354 | -0.355 | -0.950 |
| 0.3008 | 0.8 | -0.132 | -0.119 | -0.952 |
| 0.3066 | 1 | 0.12 | 0.15 | -0.96 |
| 0.2998 | 2 | 1.08 | 1.11 | -0.96 |
| 0.3087 | 3 | 2.06 | 2.10 | -0.96 |
| 0.3064 | 4 | 3.05 | 3.10 | -0.95 |
| 0.3017 | 5 | 4.03 | 4.11 | -0.96 |

**T-CHAC, 323 K (Single Replicate)**

| **Trial** | **Mass AC (g)** | **Nominal P (bar)** | **Initial P (bar)** | **Final P (bar)** | **Vacuum (bar)** |
| --- | --- | --- | --- | --- | --- |
| 1 | 0.2976 | 0.2 | -0.739 | -0.733 | -0.951 |
| 0.2993 | 0.4 | -0.547 | -0.537 | -0.950 |
| 0.3045 | 0.6 | -0.343 | -0.332 | -0.950 |
| 0.2996 | 0.8 | -0.139 | -0.112 | -0.953 |
| 0.4948 | 1 | 0.08 | 0.14 | -0.96 |
| 0.3044 | 2 | 1.04 | 1.10 | -0.96 |
| 0.2984 | 3 | 2.07 | 2.13 | -0.95 |
| 0.2982 | 4 | 3.03 | 3.11 | -0.95 |
| 0.3130 | 5 | 4.13 | 4.23 | -0.95 |

# APPENDIX F: Gravimetric Measurements

The study originally was a study of low-cost gravimetric gas adsorption. However, the rapid desorption upon evacuating the gas to unload the sample and weight led to erroneously low mass data. However, these are presented for reference. These are used to get the mass of AC in the data in Appendix E.

**CHAC, 303 K (Masses)**

| **Trial** | **Sample Loader, SL (g)** | **SL+AC, Initial (g)** | **SL+AC, Final (g)** |
| --- | --- | --- | --- |
| 1 | 282.7743 | 283.1053 | 283.1145 |
| 282.6865 | 283.0134 | 283.0293 |
| 282.5991 | 282.8981 | 282.9085 |
| 282.6054 | 282.9125 | 282.9212 |
| 282.5917 | 282.8821 | 282.8948 |
| 282.6498 | 282.9472 | 282.9643 |
| 282.6002 | 282.8995 | 282.9146 |
| 282.7113 | 283.0120 | 283.0289 |
| 282.5490 | 282.8483 | 282.8643 |
| 2 | 282.7209 | 283.0328 | 283.0431 |
| 282.6212 | 282.9379 | 282.9521 |
| 282.6912 | 283.0132 | 283.0252 |
| 282.6722 | 282.9916 | 283.0032 |
| 282.6512 | 282.9732 | 282.9864 |
| 282.6802 | 283.0021 | 283.0146 |
| 282.6018 | 282.9217 | 282.9381 |
| 282.7621 | 283.0789 | 283.0895 |
| 282.6184 | 282.9401 | 282.9545 |
| 3 | 282.6412 | 282.9408 | 282.9504 |
| 282.7002 | 282.9993 | 283.0124 |
| 282.6749 | 282.9778 | 282.9871 |
| 282.7129 | 283.0230 | 283.0351 |
| 282.6822 | 282.9854 | 282.9961 |
| 282.7213 | 283.0196 | 283.0309 |
| 282.7229 | 283.0213 | 283.0329 |
| 282.7143 | 283.0095 | 283.0247 |
| 282.6992 | 282.9984 | 283.0074 |

**BAC, 303 K (Masses)**

| **Trial** | **Sample Loader, SL (g)** | **SL+AC, Initial (g)** | **SL+AC, Final (g)** |
| --- | --- | --- | --- |
| 1 | 282.7411 | 283.0478 | 283.0591 |
| 282.6835 | 282.9895 | 283.0023 |
| 282.6692 | 282.9674 | 282.9786 |
| 282.6107 | 282.9143 | 282.9284 |
| 282.7832 | 283.0023 | 283.0143 |
| 282.6544 | 282.9457 | 282.9581 |
| 282.7104 | 283.0198 | 283.0374 |
| 282.7296 | 283.0201 | 283.0389 |
| 282.6990 | 282.9906 | 283.0075 |
| 2 | 282.7498 | 283.0502 | 283.0634 |
| 282.6883 | 283.0002 | 283.0109 |
| 282.6801 | 282.9884 | 283.0012 |
| 282.6254 | 282.9178 | 282.9289 |
| 282.5986 | 282.9012 | 282.9134 |
| 282.7078 | 282.9994 | 283.0132 |
| 282.7318 | 283.0327 | 283.0454 |
| 282.7344 | 283.0298 | 283.0402 |
| 282.7560 | 283.0561 | 283.0693 |
| 3 | 282.6276 | 282.9304 | 282.9402 |
| 282.6809 | 282.9779 | 282.9891 |
| 282.7114 | 283.0038 | 283.0165 |
| 282.7610 | 283.0601 | 283.0732 |
| 282.6098 | 282.9033 | 282.9162 |
| 282.7087 | 283.0082 | 283.0196 |
| 282.7102 | 283.0104 | 283.0221 |
| 282.7416 | 283.0501 | 283.0608 |
| 282.6393 | 282.9317 | 282.9443 |

**A-CHAC, 303 K (Masses)**

| **Trial** | **Sample Loader, SL (g)** | **SL+AC, Initial (g)** | **SL+AC, Final (g)** |
| --- | --- | --- | --- |
| 1 | 282.7102 | 283.0129 | 283.0230 |
| 282.6917 | 282.9902 | 283.0007 |
| 282.7439 | 283.0451 | 283.0549 |
| 282.6834 | 282.9817 | 282.9954 |
| 282.5812 | 282.8801 | 282.8893 |
| 282.4051 | 282.7109 | 282.7236 |
| 282.5231 | 282.8198 | 282.8353 |
| 282.6921 | 282.9894 | 283.0019 |
| 282.7008 | 282.9994 | 283.0139 |

**B-CHAC, 303 K (Masses)**

| **Trial** | **Sample Loader, SL (g)** | **SL+AC, Initial (g)** | **SL+AC, Final (g)** |
| --- | --- | --- | --- |
| 1 | 282.7002 | 283.0056 | 283.0164 |
| 282.7103 | 283.0124 | 283.0219 |
| 282.7480 | 283.0412 | 283.0554 |
| 282.6101 | 282.9109 | 282.9201 |
| 282.5632 | 282.8698 | 282.8902 |
| 282.6513 | 282.9511 | 282.9625 |
| 282.7834 | 283.0921 | 283.1102 |
| 282.7134 | 283.0198 | 283.0354 |
| 282.6743 | 282.9760 | 282.9937 |

**T-CHAC, 323 K (Masses)**

| **Trial** | **Sample Loader, SL (g)** | **SL+AC, Initial (g)** | **SL+AC, Final (g)** |
| --- | --- | --- | --- |
| 1 | 282.6516 | 282.9492 | 282.9506 |
| 282.7201 | 283.0194 | 283.0215 |
| 282.5209 | 282.8254 | 282.8271 |
| 282.6224 | 282.9220 | 282.9229 |
| 282.4505 | 282.9453 | 282.9463 |
| 282.7477 | 283.0521 | 283.0534 |
| 282.7019 | 283.0003 | 283.0015 |
| 282.5439 | 282.8421 | 282.8438 |
| 282.6401 | 282.9531 | 282.9542 |
